# Supplementary material for: Psychological Adaptations to High-Intensity Interval Training in Overweight and Obese Adults: A Topical Review
Source: MDPI journal article supplement (doi:10.3390/sports10050064), 2022-04-22
Supplement: s1 [file s1]

**Table S1.** PubMed/MEDLINE search algorithms and results.

| Search | Query                                                                               | Items found |
|--------|-------------------------------------------------------------------------------------|-------------|
| 28     | Search (4 AND 13 AND 27)                                                            | 108         |
| 27     | Search (14 OR 15 OR 16 OR 17 OR 18 OR 19 OR 20 OR 21 OR 22 OR 23 OR 24 OR 25 OR 26) | 1,214,725   |
| 26     | Search mental health[Title/Abstract]                                                | 162,123     |
| 25     | Search perceptual[Title/Abstract]                                                   | 52,822      |
| 24     | Search psychological[Title/Abstract]                                                | 257,887     |
| 23     | Search arousal[Title/Abstract]                                                      | 30,938      |
| 22     | Search feeling[Title/Abstract]                                                      | 36,409      |
| 21     | Search depression[Title/Abstract]                                                   | 384,167     |
| 20     | Search anxiety[Title/Abstract]                                                      | 228,470     |
| 19     | Search mood[Title/Abstract]                                                         | 83,450      |
| 18     | Search quality of life[Title/Abstract]                                              | 319,872     |
| 17     | Search affect[Title/Abstract]                                                       | 745,717     |
| 16     | Search enjoyment[Title/Abstract]                                                    | 6,413       |
| 15     | Search compliance[Title/Abstract]                                                   | 129,827     |
| 14     | Search adherence[Title/Abstract]                                                    | 139,852     |
| 13     | Search (5 OR 6 OR 7 OR 8 OR 9 OR 10 OR 11 OR 12)                                    | 4,619       |
| 12     | Search HIIE[Title/Abstract]                                                         | 284         |
| 11     | Search HIIT[Title/Abstract]                                                         | 1,599       |
| 10     | Search high-intensity intermittent exercise[Title/Abstract]                         | 274         |
| 9      | Search high-intensity intermittent training[Title/Abstract]                         | 83          |
| 8      | Search high-intensity interval exercise[Title/Abstract]                             | 468         |
| 7      | Search high-intensity interval training[Title/Abstract]                             | 2,373       |
| 6      | Search interval exercise[Title/Abstract]                                            | 861         |
| 5      | Search interval training[Title/Abstract]                                            | 3,632       |
| 4      | Search (1 OR 2 OR 3)                                                                | 364,265     |
| 3      | Search overweight[Title/Abstract]                                                   | 79,678      |
| 2      | Search obese[Title/Abstract]                                                        | 139,477     |
| 1      | Search obesity[Title/Abstract]                                                      | 287,875     |
